# Supplementary material for: STOP1 Regulates Multiple Genes That Protect Arabidopsis from Proton and Aluminum Toxicities
Source: Oxford University Press journal article supplement (doi:10.1104/pp.108.134700), 2009-03-25
Supplement: plphys_v150_1_281_s1.zip [file plphys_v150_1_281_s1.zip]

Archive with 6 entries (6 files):
- 134700Supplemental_Fig._S1.pdf
- 134700Supplemental_Table_S1.xls
- 134700Supplemental_Table_S2.xls
- 134700Supplemental_Table_S3.xls
- 134700Supplemental_Table_S4.xls
- 134700Supplemental_Table_S5.xls
