# Supplementary material for: STOP1 Regulates Multiple Genes That Protect Arabidopsis from Proton and Aluminum Toxicities
Source: Oxford University Press journal article supplement (doi:10.1104/pp.108.134700), 2009-03-25
Supplement: plphys_v150_1_281_s1.zip [file plphys_v150_1_281_s1.zip › 134700Supplemental_Fig._S1.pdf]

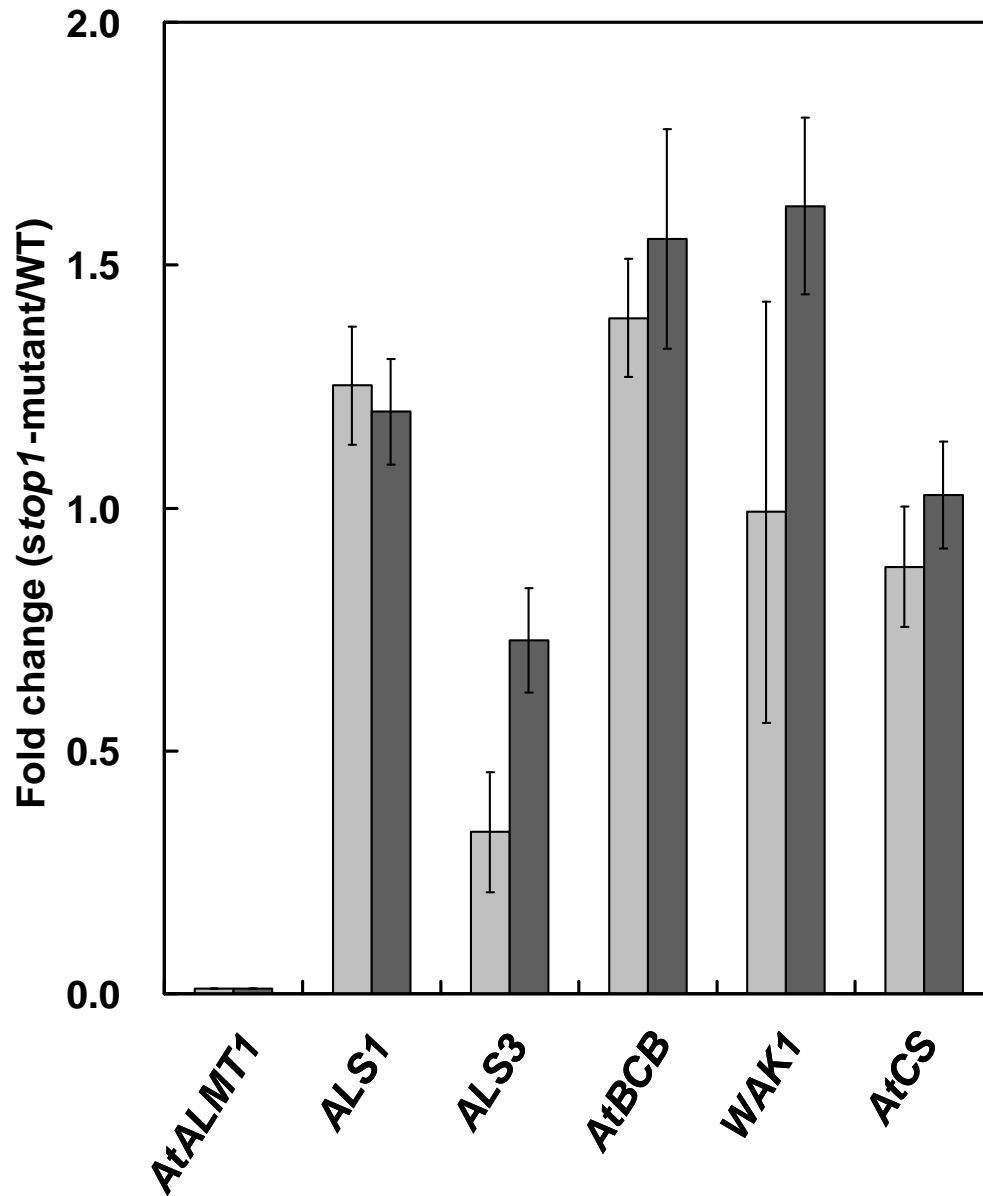

**Supplemental Figure S1.** Fold change of gene expression in microarray, whose gene is associated with Al tolerance as follows; *AtALMT1* (Hoekenga et al., 2006), *ALS1* (Larsen et al., 2007), *ALS3* (Larsen et al., 2005), *AtBCB* (Ezaki et al., 2000), *WAK1* (Sivaguru et al., 2003), *AtCS* (Koyama et al., 2000). Biologically independent 3 replication of competitive microarray analyses were carried out as follows; *stop1*-mutant versus wild type in Al (10  $\mu$ M, 24 h; light gray) and low pH (pH 4.5, 24 h; dark gray). Fold change and whose  $\pm$  SD are shown.
