# Supplementary material for: STOP1 Regulates Multiple Genes That Protect Arabidopsis from Proton and Aluminum Toxicities
Source: Oxford University Press journal article supplement (doi:10.1104/pp.108.134700), 2009-03-25
Supplement: plphys_v150_1_281_s1.zip [file plphys_v150_1_281_s1.zip › 134700Supplemental_Table_S1.xls]

## Sheet: S1
Supplemental Table S1. List of down-regulated genes in the stop1-mutant among down-regulated or stable genes in WT under Al and low pH conditions (see Fig. 1).
AGI code	Fold change (stop1-mutant or AtALMT1-KO/WT)									Fold change in the WT with Al or low pH treatments (treatment/control)						Description
	Al stop1-mutant			low pH stop1-mutant			Al AtALMT-KO			Al			low pH
	FC ± SD	P-value		FC ± SD	P-value		FC ± SD	P-value		FC ± SD	P-value		FC ± SD	P-value
Repressed in stop1-mutant, and down-regulated or stable in WT with Al and low pH treatments; 19 genes
At1g51830	0.02 ± 0.00	0.001		0.10 ± 0.03	0.007		0.98 ± 0.14	0.83		2.65 ± 0.75	0.026		0.63 ± 0.22	0.147		ATP binding / kinase/ protein serine/threonine kinase
At1g51850	0.10 ± 0.01	0		0.43 ± 0.07	0.014		0.87 ± 0.12	0.226		0.45 ± 0.16	0.054		0.38 ± 0.05	0.005		putative, leucine-rich repeat protein kinase
At1g52070	0.01 ± 0.00	0		0.03 ± 0.02	0.013		1.04 ± 0.15	0.668		0.40 ± 0.21	0.083		0.05 ± 0.01	0.001		jacalin lectin family protein
At1g56430	0.31 ± 0.02	0.001		0.37 ± 0.16	0.053		2.01 ± 0.32	0.016		0.16 ± 0.01	0.001		1.07 ± 0.10	0.338		NAS4 (nicotianamine synthase 4)
At1g67325	0.24 ± 0.02	0.001		0.25 ± 0.01	0.001		1.00 ± 0.14	0.977		0.93 ± 0.08	0.253		0.80 ± 0.13	0.14		RanBP2-type zinc finger protein
At1g80240	0.06 ± 0.01	0.001		0.30 ± 0.09	0.021		0.95 ± 0.13	0.569		0.83 ± 0.09	0.086		0.32 ± 0.05	0.007		unknown protein
At2g43480	0.31 ± 0.05	0.007		0.39 ± 0.09	0.018		1.03 ± 0.15	0.798		0.72 ± 0.17	0.139		0.51 ± 0.18	0.074		PER26 (peroxidase 26 precursor)
At2g44110	0.29 ± 0.02	0.001		0.38 ± 0.02	0.001		0.98 ± 0.34	0.915		0.38 ± 0.05	0.007		0.35 ± 0.02	0.001		MLO15 (mildew resistance locus o 15)
At3g20380	0.08 ± 0.04	0.011		0.29 ± 0.11	0.028		1.23 ± 0.18	0.129		0.85 ± 0.09	0.109		0.58 ± 0.30	0.193		MATH domain-containing protein
At3g28345	0.15 ± 0.01	0		0.26 ± 0.05	0.006		1.24 ± 0.18	0.123		0.65 ± 0.40	0.312		1.29 ± 0.24	0.139		MDR13 (ABC transporter family protein)
At3g46270	0.12 ± 0.02	0.001		0.28 ± 0.04	0.004		0.73 ± 0.18	0.089		0.35 ± 0.03	0.002		0.49 ± 0.19	0.078		receptor protein kinase-related
At3g46280	0.08 ± 0.02	0.003		0.25 ± 0.06	0.008		0.79 ± 0.12	0.111		0.34 ± 0.07	0.01		0.29 ± 0.04	0.004		receptor protein kinase-related
At3g50640	0.18 ± 0.03	0.003		0.41 ± 0.05	0.006		0.50 ± 0.08	0.016		0.31 ± 0.07	0.012		0.15 ± 0.03	0.005		unknown protein
At3g61940	0.21 ± 0.05	0.007		0.24 ± 0.12	0.033		2.90 ± 0.76	0.002		0.04 ± 0.00	0		0.36 ± 0.03	0.003		ATMTPA1 (zinc transporter family)
At4g30670	0.11 ± 0.01	0.001		0.31 ± 0.07	0.012		1.15 ± 0.16	0.233		2.20 ± 0.42	0.019		0.52 ± 0.04	0.004		unknown protein
At5g03860	0.29 ± 0.06	0.01		0.42 ± 0.05	0.005		2.09 ± 0.52	0.007		0.39 ± 0.05	0.006		0.69 ± 0.10	0.046		Malate synthase
At5g25460	0.03 ± 0.00	0.001		0.22 ± 0.11	0.03		0.92 ± 0.13	0.391		2.84 ± 0.53	0.01		0.30 ± 0.05	0.006		unknown protein
At5g27920	0.15 ± 0.02	0.002		0.15 ± 0.00	0		0.99 ± 0.18	0.95		1.26 ± 0.23	0.161		0.90 ± 0.20	0.504		similar to FBL3 (F-box family protein)
At5g58784	0.12 ± 0.02	0.002		0.29 ± 0.12	0.032		0.46 ± 0.08	0.015		0.60 ± 0.19	0.103		0.39 ± 0.05	0.007		dehydrodolichyl diphosphate synthase 5
Repressed in stop1-mutant, and down-regulated or stable in WT with Al treatment; 45 genes
At1g01750	0.15 ± 0.02	0.001		0.45 ± 0.21	0.088		0.33 ± 0.07	0.004		0.29 ± 0.06	0.01		0.27 ± 0.06	0.01		ADF10 (actin-depolymerizing factor 10)
At1g05250	0.12 ± 0.08	0.025		0.53 ± 0.23	0.114		1.54 ± 0.23	0.037		0.14 ± 0.01	0.001		0.08 ± 0.01	0.001		PER2 (peroxidase 1/2 precursor)
At1g12090	0.28 ± 0.02	0.001		0.80 ± 0.10	0.089		0.50 ± 0.08	0.017		0.33 ± 0.11	0.026		0.25 ± 0.05	0.007		ELP (extensin-like protein)
At1g14220	0.20 ± 0.07	0.014		0.66 ± 0.21	0.147		0.83 ± 0.13	0.171		0.39 ± 0.03	0.002		0.27 ± 0.03	0.003		similar to RNS3 (ribonuclease 3)
At1g22500	0.15 ± 0.04	0.006		0.96 ± 0.18	0.72		0.99 ± 0.14	0.924		0.33 ± 0.12	0.034		0.68 ± 0.29	0.24		ATL1C (RING-H2 finger protein ATL1C precursor)
At1g23750	0.23 ± 0.03	0.003		0.51 ± 0.16	0.059		0.51 ± 0.08	0.018		0.40 ± 0.13	0.037		0.26 ± 0.08	0.016		DNA-binding protein-related
At1g27140	0.07 ± 0.03	0.008		0.49 ± 0.10	0.024		0.21 ± 0.07	0.001		0.53 ± 0.24	0.127		0.24 ± 0.06	0.011		ATGSTU14 (glutathione S‐transferase TAU 14)
At1g30870	0.08 ± 0.03	0.007		0.68 ± 0.15	0.088		0.30 ± 0.07	0.001		0.10 ± 0.02	0.002		0.10 ± 0.02	0.003		PER7 (peroxidase 7 precursor)
At1g48930	0.15 ± 0.01	0		0.76 ± 0.12	0.096		0.42 ± 0.09	0.003		0.16 ± 0.03	0.003		0.17 ± 0.04	0.006		ATGH9C1 (glycosyl hydrolase 9C1)
At1g49030	0.11 ± 0.04	0.009		0.50 ± 0.17	0.069		0.24 ± 0.08	0.002		0.48 ± 0.04	0.004		0.54 ± 0.10	0.029		unknown protein
At1g49860	0.29 ± 0.03	0.002		0.63 ± 0.26	0.18		1.06 ± 0.30	0.738		0.29 ± 0.14	0.041		0.85 ± 0.24	0.414		ATGSTF14 (glutathione transferase)
At1g66470	0.30 ± 0.02	0.001		0.83 ± 0.10	0.117		0.71 ± 0.10	0.056		0.82 ± 0.21	0.31		0.55 ± 0.07	0.013		basic helix-loop-helix (bHLH) family protein
At1g75780	0.30 ± 0.03	0.002		0.67 ± 0.06	0.014		0.72 ± 0.11	0.059		0.49 ± 0.24	0.118		0.24 ± 0.06	0.009		TUB1 (Tubulin beta-1 chain）
At2g04160	0.21 ± 0.03	0.003		0.54 ± 0.11	0.036		1.30 ± 0.19	0.087		0.43 ± 0.21	0.088		0.17 ± 0.04	0.006		AIR3 (auxin-induced in root cultures 3)
At2g25810	0.13 ± 0.04	0.006		0.68 ± 0.15	0.095		0.28 ± 0.06	0.005		0.51 ± 0.04	0.005		0.59 ± 0.15	0.069		TIP4;1 (tonoplast intrinsic protein 4;1)
At2g27370	0.28 ± 0.07	0.012		0.62 ± 0.11	0.046		0.75 ± 0.11	0.072		0.63 ± 0.00	0		0.60 ± 0.09	0.029		integral membrane family protein
At2g34180	0.25 ± 0.04	0.004		1.45 ± 0.45	0.171		1.54 ± 0.30	0.019		0.60 ± 0.05	0.009		0.78 ± 0.31	0.384		CIPK13 (CBL-interacting protein kinase 13)
At2g39430	0.32 ± 0.04	0.005		0.57 ± 0.14	0.059		0.79 ± 0.12	0.085		0.25 ± 0.08	0.016		0.17 ± 0.01	0		disease resistance-responsive protein-related
At3g10710	0.27 ± 0.12	0.034		0.75 ± 0.26	0.275		1.50 ± 0.24	0.046		0.25 ± 0.10	0.024		0.29 ± 0.13	0.036		pectinesterase family protein
At3g43960	0.27 ± 0.05	0.007		0.60 ± 0.08	0.021		0.64 ± 0.09	0.033		0.51 ± 0.10	0.026		0.34 ± 0.04	0.004		putative cysteine proteinase
At3g59370	0.17 ± 0.04	0.006		0.46 ± 0.09	0.018		0.24 ± 0.06	0.008		0.48 ± 0.20	0.085		0.36 ± 0.11	0.027		unknown protein
At4g00080	0.16 ± 0.03	0.002		0.68 ± 0.18	0.127		0.91 ± 0.13	0.345		0.73 ± 0.04	0.009		0.42 ± 0.07	0.012		UNE11 (unfertilized embryo sac 11)
At4g01950	0.22 ± 0.03	0.002		0.68 ± 0.19	0.139		0.53 ± 0.08	0.019		0.60 ± 0.04	0.006		0.69 ± 0.02	0.001		ATGPAT3 (glycerol-3-phosphate acyltransferase 3)
At4g10350	0.32 ± 0.02	0.001		0.49 ± 0.17	0.066		0.89 ± 0.18	0.376		0.37 ± 0.04	0.003		0.27 ± 0.02	0.002		ANAC070 (NAC domain containing protein 70)
At4g19030	0.25 ± 0.05	0.008		0.59 ± 0.03	0.003		0.57 ± 0.09	0.023		0.34 ± 0.10	0.024		0.16 ± 0.02	0.001		NIP1;1 (NOD26-like intrinsic protein 1;1)
At4g25560	0.31 ± 0.03	0.003		0.73 ± 0.09	0.048		0.91 ± 0.13	0.365		0.58 ± 0.08	0.02		0.44 ± 0.02	0.002		ATMYB18 (MYB domain protein 18)
At4g26010	0.10 ± 0.05	0.014		0.86 ± 0.29	0.501		0.79 ± 0.14	0.087		0.14 ± 0.04	0.008		0.05 ± 0.02	0.004		PER44 (peroxidase 44 precursor)
At4g31470	0.18 ± 0.05	0.008		0.59 ± 0.11	0.041		0.41 ± 0.08	0.004		0.20 ± 0.02	0.002		0.17 ± 0.04	0.005		putative pathogenesis-related protein
At4g31940	0.13 ± 0.09	0.032		0.34 ± 0.25	0.105		1.09 ± 0.35	0.654		0.04 ± 0.01	0.005		0.21 ± 0.27	0.113		CYP82C4 (cytochrome P450, family 82, subfamily C, polypeptide 4)
At4g33880	0.13 ± 0.04	0.008		0.51 ± 0.07	0.013		0.56 ± 0.10	0.028		0.18 ± 0.03	0.004		0.37 ± 0.10	0.022		basic helix-loop-helix (bHLH) family protein
At4g34580	0.16 ± 0.04	0.007		0.59 ± 0.14	0.056		0.83 ± 0.13	0.178		0.13 ± 0.02	0.001		0.09 ± 0.04	0.009		similar to SEC14 cytosolic factor family protein
At4g34930	0.34 ± 0.01	0		0.67 ± 0.15	0.087		0.71 ± 0.11	0.049		0.72 ± 0.10	0.06		1.12 ± 0.15	0.295		1-phosphatidylinositol phosphodiesterase-related
At4g37160	0.17 ± 0.02	0.001		0.41 ± 0.13	0.035		0.48 ± 0.08	0.017		0.37 ± 0.21	0.085		0.15 ± 0.06	0.015		SKS15 (SKU5 Similar 15)
At5g05500	0.32 ± 0.03	0.002		0.82 ± 0.11	0.117		0.50 ± 0.08	0.017		0.19 ± 0.04	0.005		0.28 ± 0.06	0.008		pollen Ole e 1 allergen and extensin family protein
At5g12940	0.32 ± 0.01	0		0.50 ± 0.10	0.027		1.05 ± 0.15	0.619		0.80 ± 0.22	0.285		0.34 ± 0.06	0.008		leucine-rich repeat family protein
At5g15150	0.21 ± 0.05	0.008		0.72 ± 0.08	0.033		0.73 ± 0.19	0.096		0.29 ± 0.08	0.016		0.31 ± 0.24	0.099		ATHB-3 (arabidopsis thaliana homeobox 3)
At5g24070	0.21 ± 0.03	0.002		0.48 ± 0.16	0.061		0.61 ± 0.22	0.096		0.10 ± 0.03	0.004		0.05 ± 0.01	0.002		PER61 (peroxidase 61 precursor)
At5g24100	0.26 ± 0.06	0.011		0.60 ± 0.08	0.022		1.07 ± 0.15	0.517		0.49 ± 0.08	0.015		0.25 ± 0.08	0.016		leucine-rich repeat transmembrane protein kinase
At5g42180	0.28 ± 0.05	0.007		0.62 ± 0.08	0.024		0.90 ± 0.13	0.308		0.27 ± 0.08	0.014		0.18 ± 0.05	0.007		PER64 (peroxidase 64 precursor)
At5g44020	0.31 ± 0.05	0.005		1.04 ± 0.14	0.668		1.07 ± 0.15	0.513		0.22 ± 0.11	0.029		0.14 ± 0.02	0.002		acid phosphatase class B family protein
At5g49270	0.18 ± 0.03	0.004		0.63 ± 0.18	0.107		0.39 ± 0.07	0.01		0.44 ± 0.17	0.06		0.37 ± 0.10	0.023		COBL9 (cobra-like protein 9)
At5g53250	0.26 ± 0.03	0.003		0.63 ± 0.18	0.106		0.79 ± 0.11	0.104		0.28 ± 0.03	0.002		0.35 ± 0.09	0.018		AGP22 (Arabinogalactan peptide 22 precursor)
At5g56320	0.23 ± 0.03	0.002		0.65 ± 0.06	0.014		0.74 ± 0.11	0.071		0.54 ± 0.14	0.056		0.29 ± 0.02	0.001		ATEXPA14 (arabidopsis thaliana expansin A14)
At5g57625	0.15 ± 0.07	0.017		0.57 ± 0.11	0.038		0.72 ± 0.13	0.047		0.09 ± 0.01	0		0.11 ± 0.06	0.015		allergen V5/Tpx-1-related family protein
At5g60530	0.31 ± 0.02	0.001		0.90 ± 0.08	0.159		0.51 ± 0.10	0.005		0.10 ± 0.06	0.017		0.06 ± 0.01	0		late embryogenesis abundant protein-related
Repressed in stop1-mutant, and down-regulated or stable in WT with low pH treatment; 9 genes
At1g28170	0.26 ± 0.18	0.064		0.41 ± 0.11	0.029		0.88 ± 0.17	0.315		0.67 ± 0.42	0.35		0.49 ± 0.31	0.168		sulfotransferase family protein
At1g32930	0.42 ± 0.08	0.015		0.40 ± 0.06	0.01		0.98 ± 0.16	0.868		0.91 ± 0.06	0.125		0.81 ± 0.04	0.014		galactosyltransferase family protein
At1g49700	0.46 ± 0.06	0.009		0.29 ± 0.09	0.02		0.78 ± 0.37	0.427		0.45 ± 0.21	0.087		0.68 ± 0.19	0.136		unknown protein
At1g80830	0.31 ± 0.09	0.019		0.41 ± 0.14	0.043		1.09 ± 0.16	0.402		0.36 ± 0.14	0.043		0.68 ± 0.28	0.231		NRAMP1 (natural resistance-associated macrophage protein 1)
At2g37820	0.29 ± 0.10	0.023		0.33 ± 0.06	0.009		0.66 ± 0.11	0.048		0.18 ± 0.03	0.004		0.54 ± 0.12	0.038		DC1 domain-containing protein
At3g47360	0.36 ± 0.03	0.003		0.34 ± 0.12	0.03		0.96 ± 0.14	0.693		0.68 ± 0.08	0.029		0.87 ± 0.06	0.082		ATHSE3 (hydroxysteroid dehydrogenase 3)
At5g09570	0.97 ± 0.03	0.153		0.42 ± 0.13	0.037		1.01 ± 0.14	0.947		0.36 ± 0.11	0.029		0.88 ± 0.22	0.472		unknown protein
At5g14740	0.32 ± 0.07	0.01		0.35 ± 0.15	0.048		2.45 ± 0.67	0.006		0.27 ± 0.11	0.028		0.73 ± 0.04	0.012		CA1 (carbonic anhydrase 1)
At5g51980	0.34 ± 0.01	0		0.32 ± 0.03	0.002		1.02 ± 0.14	0.866		0.98 ± 0.10	0.734		0.91 ± 0.06	0.146		ZFWD2 (WD-40 repeat family protein)
Biologically independent 3 replication of competitive microarray analyses were carried out as follows; stop1-mutant versus wild type (WT) in Al (10 μM, 24 h) or low pH (pH 4.5, 24 h); AtALMT1-KO versus WT in Al (10 μM, 24 h); Control (pH 5.0 no Al, 24 h) versus Al (10 μM, pH 5.0, 24 h) or low pH (pH 4.5, 24 h) in WT. Fold change (FC) and whose ± SD are shown. P-value of t-test for significant dif…
