# Supplementary material for: STOP1 Regulates Multiple Genes That Protect Arabidopsis from Proton and Aluminum Toxicities
Source: Oxford University Press journal article supplement (doi:10.1104/pp.108.134700), 2009-03-25
Supplement: plphys_v150_1_281_s1.zip [file plphys_v150_1_281_s1.zip › 134700Supplemental_Table_S2.xls]

## Sheet: S2
	Supplemental Table S2. Metabolite profile in major carbohydrate metabolic pathways (see Fig. 5) of the STOP1-KO relative to those determined for the WT under low pH conditions.
		method	Ratio of STOP1-KO to WT
			rep.1	rep.2	rep.3	mean±SD
	4-aminobutyrate	GC-MS	0.61998	0.482866	0.59835	0.57 ± 0.07a
	2-oxoglutarate	GC-MS	1.19204	0.732859	1.05301	0.99 ± 0.24
	citrate	GC-MS	0.699457	0.756099	0.931202	0.80 ± 0.12
	fructose	GC-MS	1.18718	1.05298	1.11117	1.12 ± 0.07
	fructose 6-phosphate	GC-MS	1.0788	1.16885	1.24699	1.16 ± 0.08
	fumarate	CE-MS	0.499805	0.722358	0.681855	0.63 ± 0.12
	glucose	GC-MS	0.276586	0.87235	0.874119	0.67 ± 0.34
	glucose 1-phosphate	GC-MS	0.58159	0.948049	0.849612	0.79 ± 0.19
	glucose 6-phosphate	GC-MS	1.08715	1.38923	1.1052	1.19 ± 0.17
	glutathione (reduced)	CE-MS	1.32231	1.21436	0.859975	1.13 ± 0.24
	glycine	GC-MS	0.774782	0.877147	0.689654	0.78 ± 0.09
	L-asparagine	GC-MS	1.21051	1.02035	1.36261	1.20 ± 0.17
	L-aspartate	GC-MS	0.782466	0.774943	0.913806	0.82 ± 0.08
	L-glutamate	GC-MS	1.1586	1.00185	1.11778	1.09 ± 0.08
	L-glutamine	GC-MS	1.41453	1.3027	1.80154	1.51 ± 0.26
	L-serine	GC-MS	1.15974	1.04355	1.11213	1.11 ± 0.06
	malate	GC-MS	0.967389	0.741653	0.898563	0.87 ± 0.12
	O-acetyl-L-serine	CE-MS	1.45339	1.70152	1.86033	1.67 ± 0.21
	pyruvate	GC-MS	0.562197	-	0.512387	0.54 ± 0.04a
	succinate	GC-MS	0.76721	0.580035	0.668483	0.67 ± 0.09a
	sucrose	GC-MS	4.09045	5.44076	4.37835	4.64 ± 0.71a
	trehalose	GC-MS	0.891851	1.03708	0.970339	0.97 ± 0.07
	Letter indicates significant difference between STOP1-KO and WT (t-test, P < 0.05).
