# Supplementary material for: STOP1 Regulates Multiple Genes That Protect Arabidopsis from Proton and Aluminum Toxicities
Source: Oxford University Press journal article supplement (doi:10.1104/pp.108.134700), 2009-03-25
Supplement: plphys_v150_1_281_s1.zip [file plphys_v150_1_281_s1.zip › 134700Supplemental_Table_S3.xls]

## Sheet: S3
	Supplemental Table 3. Relative expression level of genes in the stop1-mutant among genes involved in major carbohydrate metabolic pathways (see also Fig. 5).
	AGI code	Fold change (stop1-mutant/WT)			Intensity		Description
		FC ± SD	P-value (1)		stop1-mutant	WT
	sucrose to fructose
	At1g12240	0.92 ± 0.12	0.373203		10009.7	10982.9	ATBETAFRUCT4 (Beta-fructofuranosidase 4)
	At1g22650	1.09 ± 0.24	0.571876		481.439	453.713	similar to beta-fructofuranosidase
	At1g35580	1.17 ± 0.22	0.285751		43263.4	38694.7	CINV1 (Cytosolic Invertase 1)
	At1g56560	1.06 ± 0.00	0.000393119		3663.13	3452.74	similar to beta-fructofuranosidase
	At1g73370	0.99 ± 0.09	0.864532		3979.62	3939.79	similar to SUS1 (Sucrose synthase 1)
	At3g05820	1.23 ± 0.18	0.133343		46.7358	38.6823	similar to beta-fructofuranosidase
	At3g06500	0.99 ± 0.04	0.714246		4451.33	4506.56	similar to beta-fructofuranosidase
	At3g43190	1.29 ± 0.23	0.129366		1101.86	819.336	similar to SUS1 (Sucrose synthase 1)
	At4g02280	1.92 ± 0.85	0.11655		555.597	282.743	similar to SUS1 (Sucrose synthase 1)
	At4g09510	0.97 ± 0.05	0.349747		1375.64	1437.64	similar to beta-fructofuranosidase
	At4g34860	0.92 ± 0.06	0.145077		7444.58	7259.41	similar to beta-fructofuranosidase
	At5g20830	1.06 ± 0.11	0.435966		4972.65	4671.78	SUS1 (Sucrose synthase 1)
	At5g22510	0.94 ± 0.06	0.249289		2976.54	3190.72	similar to beta-fructofuranosidase
	At5g37180	0.97 ± 0.05	0.434133		1487.24	1538.17	similar to SUS1 (Sucrose synthase 1)
	At5g49190	1.03 ± 0.10	0.678686		119.445	117.591	SUS2 (Sucrose synthase 2)
	sucrose to glucose 1-P
	At1g73370	0.99 ± 0.09	0.864532		3979.62	3939.79	similar to SUS1 (Sucrose synthase 1)
	At3g43190	1.29 ± 0.23	0.129366		1101.86	819.336	similar to SUS1 (Sucrose synthase 1)
	At4g02280	1.92 ± 0.85	0.11655		555.597	282.743	similar to SUS1 (Sucrose synthase 1)
	At5g17310	1.11 ± 0.05	0.0559208		4384.82	3959.94	UTP-glucose-1-phosphate uridylyltransferase 1
	At5g20830	1.06 ± 0.11	0.435966		4972.65	4671.78	SUS1 (Sucrose synthase 1)
	At5g37180	0.97 ± 0.05	0.434133		1487.24	1538.17	similar to SUS1 (Sucrose synthase 1)
	At5g49190	1.03 ± 0.10	0.678686		119.445	117.591	SUS2 (Sucrose synthase 2)
	sucrose to glucose
	At1g12240	0.92 ± 0.12	0.373203		10009.7	10982.9	ATBETAFRUCT4 (Beta-fructofuranosidase 4)
	At1g22650	1.09 ± 0.24	0.571876		481.439	453.713	similar to beta-fructofuranosidase
	At1g35580	1.17 ± 0.22	0.285751		43263.4	38694.7	CINV1 (Cytosolic Invertase 1)
	At1g56560	1.06 ± 0.00	0.000393119		3663.13	3452.74	similar to beta-fructofuranosidase
	At3g05820	1.23 ± 0.18	0.133343		46.7358	38.6823	similar to beta-fructofuranosidase
	At3g06500	0.99 ± 0.04	0.714246		4451.33	4506.56	similar to beta-fructofuranosidase
	At4g09510	0.97 ± 0.05	0.349747		1375.64	1437.64	similar to beta-fructofuranosidase
	At4g34860	0.92 ± 0.06	0.145077		29268.6	29508.2	similar to beta-fructofuranosidase
	At5g22510	0.94 ± 0.06	0.249289		2976.54	3190.72	similar to beta-fructofuranosidase
	fructose to fructose 6-P
	At2g19860	1.00 ± 0.02	0.695712		2748.03	2730.49	HXK2 (Hexokinase 2)
	At4g29130	1.00 ± 0.08	0.94056		8306.1	8434.36	HXK1 (Hexokinase 1)
	glucose 1-P to glucose 6-P
	At1g23190	0.97 ± 0.13	0.71208		10717.6	11361.4	similar to phosphoglucomutase
	At1g70730	0.87 ± 0.07	0.0943629		8726.02	10044.9	similar to phosphoglucomutase
	At5g51820	0.86 ± 0.13	0.222699		1149.93	1357.24	PGM1 (Phosphoglucomutase 1)
	glucose to glucose 6-P
	At1g47840	0.67 ± 0.02a	0.00276077		4588.12	6767.75	HXK3 (Hexokinase 3)
	At1g50460	0.94 ± 0.03	0.0792567		3515.28	3770.54	HKL1 (Hexokinase like 1)
	At2g19860	1.00 ± 0.02	0.695712		2748.03	2730.49	HXK2 (Hexokinase 2)
	At3g20040	0.76 ± 0.02a	0.00351806		3252.49	4310.78	HXK4 (Hexokinase 4)
	At4g29130	1.00 ± 0.08	0.94056		8306.1	8434.36	HXK1 (Hexokinase 1)
	At4g37840	0.64 ± 0.15	0.0765763		71541.8	48773.4	HKL3 (Hexokinase like 3)
	glucose 6-P to fructose 6-P
	At4g24620	0.94 ± 0.12	0.509284		17907.6	18686.4	PGI1 (Phosphoglucose Isomerase 1)
	At5g42740	1.04 ± 0.15	0.669587		4443.86	4248.06	PGIC (Glucose-6-phosphate isomerase, cytosolic)
	a-D-glucose-6-P to trehalose
	At1g06410	1.03 ± 0.04	0.369486		8158.52	7872.12	ATTPS7 (Trehalose-6-phosphate synthase 7)
	At1g22210	1.29 ± 0.12	0.0432016		66.514	52.4745	similar to ATTPPB (Trehalose-6-phosphate phosphatases)
	At1g23870	1.01 ± 0.26	0.942011		9278.48	8813.22	ATTPS9 (Trehalose-6-phosphate synthase 9)
	At1g35910	1.19 ± 0.24	0.27061		5312.61	4171.31	similar to trehalose-6-phosphate phosphatase
	At1g60140	1.09 ± 0.25	0.571878		15516.1	13641.6	ATTPS10 (Trehalose-6-phosphate synthase 10)
	At1g68020	0.78 ± 0.07a	0.0400623		2022.01	2514.6	ATTPS6 (Trehalose-6-phosphate synthase 6)
	At1g70290	0.99 ± 0.12	0.929053		2968.25	3056.88	ATTPS8 (Trehalose-6-phosphate synthase 8)
	At1g78090	1.49 ± 0.29	0.0693853		8380.62	5931.84	ATTPPB (Trehalose-6-phosphate phosphatases)
	At1g78580	0.83 ± 0.13	0.1732		3235.95	3957.6	ATTPS1 (Trehalose-6-phosphate synthase 1)
	At2g18700	1.28 ± 0.15	0.0688679		2869.66	2140.06	ATTPS11 (Trehalose-6-phosphate synthase 11)
	At2g22190	1.46 ± 0.31	0.089478		6257.71	4783.49	similar to trehalose-6-phosphate phosphatase
	At4g12430	1.24 ± 0.35	0.306808		1907.41	1639.61	similar to trehalose-6-phosphate phosphatase
	At4g17770	0.80 ± 0.15	0.177637		7561.43	9650.98	ATTPS5 (Trehalose-6-phosphate synthase 5)
	At4g22590	1.22 ± 0.27	0.254921		12844.2	10795.3	similar to trehalose-6-phosphate phosphatase
	At4g27550	0.73 ± 0.29	0.290516		20.8676	31.9445	similar to ATTPS2 (Trehalose-6-phosphate synthase 2)
	At4g39770	1.22 ± 0.20	0.172147		6970.67	6081.24	similar to trehalose-6-phosphate phosphatase
	At5g51460	1.03 ± 0.04	0.337979		3125.93	3047.18	ATTPPA (Trehalose-6-phosphate phosphatases)
	trehalose to glucose
	At4g24040	1.09 ± 0.26	0.584438		848.964	832.911	ATTRE1 (Trehalase 1)
	fructose 6-P to glyceraldehyde-3-P
	At1g18270	0.96 ± 0.16	0.743979		9058.86	9400.41	similar to 6-phosphogluconate dehydrogenase
	At2g01140	1.10 ± 0.18	0.395328		33744.4	30996.3	Fructose-bisphosphate aldolase 3
	At2g21170	0.88 ± 0.14	0.297708		15006.9	17127.5	TIM (Triosephosphate isomerase)
	At2g21330	2.55 ± 2.15	0.157261		248.536	64.1403	Fructose-bisphosphate aldolase 1
	At2g22480	0.91 ± 0.10	0.265868		9828.75	10727.8	PFK5 (Phosphofructokinase 5)
	At2g36460	0.84 ± 0.07	0.073136		19426.8	23249.3	similar to fructose-bisphosphate aldolase
	At3g52930	0.79 ± 0.04a	0.0129152		90554.2	114717	similar to fructose-bisphosphate aldolase
	At3g55440	0.93 ± 0.02	0.017373		88712.6	95021.2	ATCTIMC (Cytosolic triose phosphate isomerase)
	At4g26270	1.38 ± 0.47	0.231278		2820.41	2139.32	PFK3 (Phosphofructokinase 3)
	At4g26520	1.68 ± 0.88	0.375415		17.8118	10	Fructose-bisphosphate aldolase
	At4g29220	1.08 ± 0.09	0.264253		10584	9652.49	PFK1 (Phosphofructokinase 1)
	At4g32840	0.96 ± 0.06	0.359222		879.439	925.041	PFK6 (Phosphofructokinase 6)
	At4g38970	4.10 ± 2.96	0.0634025		6970.67	6081.24	Fructose-bisphosphate aldolase 2
	At5g03690	0.98 ± 0.09	0.690822		1498.47	1549.09	similar to fructose-bisphosphate aldolase
	At5g47810	0.85 ± 0.15	0.26265		859.593	1031.76	PFK2 (Phosphofructokinase 2)
	At5g56630	0.90 ± 0.10	0.229947		13698.2	15456.7	PFK7 (Phosphofructokinase 7)
	At5g61580	0.97 ± 0.09	0.626635		4787.01	4815.57	PFK4 (Phosphofructokinase 4)
	glyceraldehyde-3-P to 3-phosphoglycerate
	At1g12900	3.02 ± 1.53	0.0571267		350.144	105.459	similar to GAPA (Glyceraldehyde-3-phosphate dehydrogenase A)
	At1g13440	0.82 ± 0.07	0.0511969		115738	139222	GAPC2 ( Glyceraldehyde-3-phosphate dehydrogenase 2)
	At1g16300	1.00 ± 0.08	0.980355		8786.54	8849.42	similar to GAPC1 ( Glyceraldehyde-3-phosphate dehydrogenase 1)
	At1g32060	4.60 ± 4.32	0.0798932		84.3008	12.5439	PRK (Phosphoribulokinase)
	At1g42970	3.10 ± 2.15	0.088857		717.769	174.537	GAPB (Glyceraldehyde-3-phosphate dehydrogenase B)
	At1g56190	0.90 ± 0.17	0.432504		590.045	691.424	Phosphoglycerate kinase
	At1g79530	0.98 ± 0.05	0.508826		36346.4	37385	similar to GAPC2 ( Glyceraldehyde-3-phosphate dehydrogenase 2)
	At1g79550	0.93 ± 0.20	0.6203		27039.1	29194.5	PGK (Phosphoglycerate kinase)
	At2g24270	2.05 ± 1.87	0.251766		218.924	85.9077	ALDH11A3 (NADP-dependent glyceraldehyde-3-phosphate dehydrogenase)
	At3g04120	0.77 ± 0.16	0.15851		55708.7	74529	GAPC (Glyceraldehyde-3-phosphate dehydrogenase C)
	At3g12780	0.99 ± 0.21	0.926564		4676.33	4852.2	PGK1 (Phosphoglycerate kinase 1)
	At3g26650	3.42 ± 2.33	0.0746778		665.041	172.481	GAPA (Glyceraldehyde-3-phosphate dehydrogenase A)
	At3g62410	1.21 ± 0.19	0.162774		38.5935	31.9789	CP12-2 (CP12 domain-containing protein 2)
	3-phosphoglycerate to PEP
	At1g09780	1.09 ± 0.19	0.474866		51144.6	47521.9	PGM1 (Phosphoglycerate mutase 1)
	At1g22170	1.05 ± 0.14	0.574079		4314.64	4056.92	similar to phosphoglycerate/bisphosphoglycerate mutase
	At1g74030	1.00 ± 0.09	0.947279		26047.5	26318.3	similar to LOS2 (Low expression of osmotically responsive genes 1)
	At1g78050	1.08 ± 0.23	0.581795		14097.9	12833.9	PGM (Phosphoglycerate/bisphosphoglycerate mutase)
	At2g29560	1.00 ± 0.05	0.907435		3345.26	3335.23	similar to LOS2 (Low expression of osmotically responsive genes 1)
	At2g36530	0.95 ± 0.13	0.582216		86862.2	92448.4	LOS2 (Low expression of osmotically responsive genes 1)
	At3g08590	1.03 ± 0.16	0.785463		3668.1	3625.77	PGM2 (Phosphoglycerate mutase 2)
	At3g50520	0.98 ± 0.02	0.270592		5603.48	5731.34	similar to phosphoglycerate/bisphosphoglycerate mutase
	At4g09520	0.84 ± 0.03	0.0182472		7183.09	8484.2	similar to phosphoglycerate/bisphosphoglycerate mutase
	At5g04120	2.88 ± 2.30	0.120645		340.935	122.923	similar to phosphoglycerate/bisphosphoglycerate mutase
	PEP to pyruvate
	At1g32440	0.99 ± 0.09	0.814273		6125.37	6181.77	PKP3 (Plastidial pyruvate kinase 3)
	At2g36580	1.09 ± 0.16	0.415454		7256.4	6880.92	similar to pyruvate kinase
	At3g22960	0.80 ± 0.03	0.00993852		9925.49	12403.9	PKP1 (Plastidial pyruvate kinase 1)
	At3g25960	0.99 ± 0.09	0.824268		115.05	118.764	similar to pyruvate kinase
	At3g49160	1.06 ± 0.13	0.51288		415.391	381.756	similar to pyruvate kinase
	At3g52990	1.13 ± 0.34	0.551435		6798.28	6417.7	similar to pyruvate kinase
	At3g55650	1.06 ± 0.15	0.525312		144.486	135.546	similar to pyruvate kinase
	At3g55810	1.01 ± 0.15	0.905521		55.8635	54.5761	similar to pyruvate kinase
	At4g26390	0.98 ± 0.08	0.704915		321.723	325.43	similar to pyruvate kinase
	At5g08570	0.94 ± 0.05	0.187342		11810.6	12695.5	similar to pyruvate kinase
	At5g52920	0.89 ± 0.01	0.00238698		19158.4	21675	PKP2 (Plastidial pyruvate kinase 2)
	At5g56350	1.06 ± 0.08	0.361555		23173.3	22059.7	similar to pyruvate kinase
	At5g63680	1.10 ± 0.11	0.226831		7770.57	7172.92	similar to pyruvate kinase
	pyruvate to acetyl-CoA
	At1g01090	0.93 ± 0.11	0.385776		40374.8	44907.7	PDH-E1 ALPHA (Pyruvate dehydrogenase E1 alpha)
	At1g24180	1.11 ± 0.03	0.0259068		29557.4	26654.1	IAR4 (Pyruvate dehydrogenase E1 alpha)
	At1g30120	0.89 ± 0.13	0.299098		9980.64	11380.5	PDH-E1 BETA (Pyruvate dehydrogenase E1 beta)
	At1g34430	0.84 ± 0.13	0.182477		5861.17	7078.16	EMB3003 (Embryo defective 3003)
	At1g48030	1.02 ± 0.09	0.731872		12188.1	12058.5	MTLPD1 (Mitochondrial Lipoamide dehydrogenase 1)
	At1g54220	1.03 ± 0.01	0.0646343		2274.71	2202.39	Dihydrolipoyllysine-residue acetyltransferase component 3 of pyruvate dehydrogenase
	At1g59900	0.96 ± 0.01	0.0383863		5368.36	5572.37	AT-E1 ALPHA (E1 alpha subunit of the pyruvate dehydrogenase)
	At3g13930	0.98 ± 0.08	0.746375		16956.3	17195.1	Dihydrolipoyllysine-residue acetyltransferase component 2 of pyruvate dehydrogenase
	At3g16950	0.84 ± 0.04	0.0278843		6899.57	8286.25	LPD1 (Lipoamide dehydrogenase 1)
	At3g17240	1.01 ± 0.03	0.674625		22674.9	22576.8	LPD2 (Lipoamide dehydrogenase 2)
	At3g25860	0.88 ± 0.04	0.0405772		12263.9	14026.3	LTA2 (Dihydrolipoamide S-acetyltransferase 2)
	At3g52200	1.00 ± 0.03	0.890445		6639.14	6634.46	LTA3 (Dihydrolipoamide S-acetyltransferase 3)
	At4g16155	0.86 ± 0.12	0.207711		390.112	456.85	PTLPD2 (Plastidic/lipoamide dehydrogenase 2)
	At5g17380	1.08 ± 0.07	0.183003		4314.44	3917.26	similar to CSR1 (Chlorsulfuron/Imidazolinone resistant 1)
	At5g50850	1.02 ± 0.05	0.587376		22178.5	21718.4	MAB1 (Pyruvate dehydrogenase)
	pyruvate to acetaldehyde
	At4g33070	1.28 ± 0.15b	0.0702822		34179.5	34344.9	similar to PDC3 (Pyruvate decarboxylase 3)
	At5g01320	1.32 ± 0.19	0.0774834		154.462	116.913	similar to PDC3 (Pyruvate decarboxylase 3)
	At5g01330	1.10 ± 0.32	0.62459		51.2023	48.6032	PDC3 (Pyruvate decarboxylase 3)
	At5g54960	1.30 ± 0.12b	0.0366374		9572.42	7431.97	PDC2 (Pyruvate decarboxylase 2)
	acetaldehyde to ethanol
	At1g77120	1.25 ± 0.31	0.251613		2322.64	1789.63	ADH1 (Alcohol dehydrogenase 1)
	pyruvate to lactate
	At4g17260	0.88 ± 0.05	0.0492193		2762.64	3158.88	similar to PMDH2 (peroxisomal NAD-malate dehydrogenase 2)
	acetyl-CoA to citrate
	At2g11270	0.98 ± 0.23	0.869377		54.1274	59.2113	similar to CSY5 (Citrate synthase 5)
	At2g44350	1.03 ± 0.10	0.692222		27664	27235.6	ATCS (Citrate synthase 4)
	At3g60100	1.06 ± 0.14	0.521091		2989.58	2859.52	CSY5 (Citrate synthase 5)
	citrate to 2-OG
	At1g54340	1.05 ± 0.05	0.214515		5484.22	5214.85	ICDH (NADP-specific isocitrate dehydrogenase)
	At1g65930	0.99 ± 0.08	0.856932		71655.6	72244.7	similar to ICDH (Isocitrate dehydrogenase)
	At2g05710	1.00 ± 0.15	0.988341		26157.4	25341.5	ACO2 (Aconitate hydratase 2)
	At2g17130	1.05 ± 0.08	0.390088		14665.5	13898.6	IDH2 (NAD+ dependent isocitrate dehydrogenase subunit 2)
	At4g26970	0.96 ± 0.18	0.753016		37217.8	36806.5	ACO3 (Aconitate hydratase 3)
	At4g35260	1.03 ± 0.10	0.604447		34.4565	37.961	IDH1 (NAD+ dependent isocitrate dehydrogenase 1)
	At4g35650	0.87 ± 0.22	0.44066		35371.5	34632.4	Isocitrate dehydrogenase NAD regulatory subunit 3 (IDH3)
	At4g35830	1.03 ± 0.07	0.52047		33.3549	47.052	ACO1 (Aconitate hydratase 1)
	At5g03290	1.04 ± 0.06	0.333797		17121.3	16461.7	Isocitrate dehydrogenase NAD catalytic subunit 5 (IDH5)
	At5g14590	0.98 ± 0.17	0.828487		6782.64	7144.95	similar to ICDH (Isocitrate dehydrogenase)
	At5g54950	1.01 ± 0.22	0.957816		92.7997	90.4819	similar to aconitate hydratase
	2-OG to succinate
	At2g20420	1.07 ± 0.09	0.314895		21575.9	20448.1	Succinyl-CoA ligase beta-chain
	At3g55410	1.03 ± 0.07	0.563478		10244.5	9949.24	similar to 2-oxoglutarate dehydrogenase E1 component
	At5g08300	1.05 ± 0.16	0.607998		20634.1	19905	Succinyl-CoA ligase subunit alpha-1
	At5g23250	0.91 ± 0.09	0.264724		6239.27	6890.1	Succinyl-CoA ligase subunit alpha-2
	At5g55070	1.07 ± 0.07	0.232611		12235.8	11546.6	similar to 2-oxoacid dehydrogenase family protein
	At5g65750	1.05 ± 0.05	0.165088		2600.4	2441.13	similar to 2-oxoglutarate dehydrogenase E1 component
	Glu to Gln
	At1g48470	0.91 ± 0.03	0.0476314		701.628	769.974	GLN1-5 (Cytosolic glutamate synthetase)
	At1g66200	0.69 ± 0.06a	0.0192436		58573.8	84217.5	ATGSR2 (Cytosolic glutamate synthetase 2)
	At3g17820	0.82 ± 0.18	0.267489		6887.81	8409.17	ATGSKB6 (Cytosolic glutamate synthetase)
	At3g53180	0.86 ± 0.09	0.127181		4699.52	5349.6	Glutamate-ammonia ligase
	At5g16570	1.44 ± 0.37	0.129623		6681.11	4339.18	GLN1-4 (Cytosolic glutamate synthetase)
	At5g35630	0.90 ± 0.04	0.0612374		12178.6	13582.4	GS2 (Glutamine synthetase 2)
	At5g37600	0.90 ± 0.13	0.328286		12923.6	13782.2	ATGSR1 (Cytosolic glutamate synthetase 1)
	Glu to 2-OG
	At1g51720	1.01 ± 0.08	0.860925		4156.62	4048.96	similar to GDH2
	At3g03910	1.41 ± 0.23	0.0695786		4224.71	2965.73	GDH3 (Glutamate dehydrogenase 3)
	At5g07440	0.54 ± 0.15a	0.059575		22571.9	45606.1	GDH2 (Glutamate dehydrogenase 2)
	At5g18170	0.27 ± 0.11a	0.0304141		1940.58	8257.83	GDH1 (Glutamate dehydrogenase 1)
	Glu to GABA
	At1g65960	0.98 ± 0.25	0.89608		15675.7	16607.5	GAD2 (glutamate decarboxylase 2)
	At2g02000	0.87 ± 0.07	0.0890163		153.396	176.213	GAD3 (glutamate decarboxylase 3)
	At2g02010	1.76 ± 0.56	0.0876102		270.631	140.557	GAD4 (glutamate decarboxylase 4)
	At3g17760	1.17 ± 0.27	0.354937		29.2503	24.5194	GAD5 (glutamate decarboxylase 5)
	At5g17330	0.49 ± 0.10a	0.0251915		24520	50641.3	GAD1 (glutamate decarboxylase 1)
	GABA to succinate
	At1g79440	1.14 ± 0.07	0.0709294		8537.19	7624.9	SSADH1 (succinic semialdehyde dehydrogenase1)
	At3g22200	0.76 ± 0.09a	0.059881		13716	18575.9	GABA-T (gamma-Aminobutyric acid transaminase)
	succinate to fumarate
	At1g08480	0.93 ± 0.12	0.42079		17555.7	18923.8	Unknown protein
	At1g47420	1.00 ± 0.05	0.962963		32858.3	32916.4	Unknown protein
	At2g18450	0.74 ± 0.19	0.175127		1044.2	1336.78	SDH1-2 (Succinate dehydrogenase)
	At2g46390	1.03 ± 0.02	0.113783		30984.2	29933.5	Unknown protein
	At2g46505	0.95 ± 0.05	0.188604		4500.37	4777.39	SDH4 (Succinate dehydrogenase)
	At3g27380	0.98 ± 0.09	0.743572		18292.4	18582.3	SDH2-1 (Succinate dehydrogenase)
	At3g47833	0.92 ± 0.06	0.144305		11730.2	12809.6	Unknown protein
	At5g40650	0.93 ± 0.14	0.501041		7857.81	8580.58	SDH2-2 (Succinate dehydrogenase)
	At5g40650	0.93 ± 0.14	0.501041		7857.81	8580.58	SDH2-2 (Succinate dehydrogenase)
	At5g65165	0.69 ± 0.18	0.12814		60.583	87.1492	SDH2-3 (Succinate dehydrogenase)
	At5g66760	1.06 ± 0.15	0.530464		18615.9	17680.8	SDH1-1 (Succinate dehydrogenase)
	fumarate to malate
	At2g47510	0.94 ± 0.24	0.706376		2912.37	3221.66	FUM1 (Fumarase 1)
	malate to OAA
	OAA to malate
	At1g04410	0.97 ± 0.05	0.392305		80988.5	83889.6	MDH1 (Malate dehydrogenase 1, cytosolic)
	At1g53240	0.95 ± 0.30	0.815236		2855.8	3055.01	MDH1 (Malate dehydrogenase 1, mitochondrial)
	At3g15020	0.99 ± 0.11	0.884508		4353.17	4428.3	MDH2 (Malate dehydrogenase 2, mitochondrial)
	At3g53910	0.82 ± 0.93	0.739396		13.78	15.3385	similar to MDH (Malate dehydrogenase)
	At5g43330	1.19 ± 0.21	0.231738		3960.23	3268.63	MDH2 (Malate dehydrogenase 2, cytosolic)
	At5g56720	1.06 ± 0.06	0.226667		1067.41	1010.18	similar to malate dehydrogenase, cytosolic
	At5g58330	1.50 ± 0.48	0.153302		274.706	185.475	similar to MDH (Malate dehydrogenase)
	malate to pyruvate
	At1g79750	0.96 ± 0.14	0.667225		10232.6	11039.8	ATNADP-ME4 (Malic enzyme 4)
	At2g13560	1.01 ± 0.03	0.650375		24116.3	24026	similar to NAD-dependent malic enzyme
	At2g19900	0.68 ± 0.09a	0.037583		2564.92	3734.65	ATNADP-ME1 (Malic enzyme 1)
	At4g00570	0.94 ± 0.05	0.160831		8775.49	9387.25	similar to NAD-dependent malic enzyme
	At5g11670	0.67 ± 0.06a	0.0174171		26980.8	39327.6	ATNADP-ME2 (Malic enzyme 2)
	At5g25880	0.87 ± 0.08	0.12168		116.005	133.111	ATNADP-ME3 (Malic enzyme 3)
	OAA to PEP
	At4g37870	1.37 ± 0.24	0.089759		3012.69	3460.53	PEPCK (phosphoenolpyruvate carboxykinase)
	At5g65690	0.86 ± 0.07	0.0798967		520.799	619.072	PEPCK (phosphoenolpyruvate carboxykinase)
	OAA to Asp
	At1g62800	0.86 ± 0.12	0.198232		17354.1	20719.6	ASP4 (Aspartate aminotransferase 4)
	At2g13810	4.43 ± 0.84	0.00522801		1113.21	269.366	similar to AGD2 (Aberrant growth and death 2)
	At2g22250	1.11 ± 0.07	0.117628		14564.7	12942	similar to aminotransferase class I and II family protein
	At2g30970	0.89 ± 0.10	0.217094		22542	25303.8	ASP1 (Aspartate aminotransferase 1)
	At4g31990	0.85 ± 0.09	0.112239		20186.7	24001.5	ASP5 (Aspartate aminotransferase 5)
	At5g11520	1.11 ± 0.13	0.235867		10161.8	8948.82	ASP3 (Aspartate aminotransferase 3)
	At5g19550	0.89 ± 0.09	0.18308		6233.88	7061.03	ASP2 (Aspartate aminotransferase 2)
	Asp to OAA
	At5g14760	2.18 ± 0.64b	0.042468		4944.48	2203.28	similar to SDH1-1 (Succinate dehydrogenase 1-1)
	Asp to Asn
	At3g47340	2.43 ± 2.03	0.168948		920.816	379.432	ASN1 (Asparagine synthetase 1)
	At5g10240	0.90 ± 0.24	0.557051		3505.16	4040.95	ASN3 (Asparagine synthetase 3)
	At5g65010	1.03 ± 0.18	0.822982		2313.94	2291.51	ASN2 (Asparagine synthetase 2)
	3-phosphoglycerate to Ser
	At1g17745	0.94 ± 0.17	0.608624		33484.7	36862.4	PGDH (3-Phosphoglycerate dehydrogenase)
	At1g18640	0.91 ± 0.06	0.124977		4579.55	5087.84	PSP (3-Phosphoserine phosphatase)
	At2g17630	0.92 ± 0.27	0.67571		4056.42	4517.32	similar to PSAT (Phosphoserine aminotransferase)
	At3g19480	1.06 ± 0.23	0.703033		74.0642	71.7952	similar to PGDH (3-Phosphoglycerate dehydrogenase)
	At4g34200	1.01 ± 0.15	0.896099		2909.67	3214.61	similar to PGDH (3-Phosphoglycerate dehydrogenase)
	At4g35630	1.01 ± 0.09	0.82445		158.329	170.173	PSAT (Phosphoserine aminotransferase)
	Ser to Gly
	At1g22020	1.02 ± 0.01	0.10221		2885.3	2826.25	SHM6 (Serine hydroxymethyltransferase 6)
	At1g36370	1.10 ± 0.06	0.0981868		4158.43	3818.41	SHM7 (Serine hydroxymethyltransferase 7)
	At4g13890	1.65 ± 0.34b	0.0492796		4681.56	3029.98	SHM5 (Serine hydroxymethyltransferase5)
	At4g13930	0.96 ± 0.21	0.779235		54422.5	58176.2	SHM4 (Serine hydroxymethyltransferase 4)
	At4g32520	0.93 ± 0.14	0.501338		5781.3	6296.53	SHM3 (Serine hydroxymethyltransferase 3)
	At4g37930	0.88 ± 0.10	0.207535		3012.69	3460.53	SHM1 (Serine hydroxymethyltransferase 1)
	At5g26780	1.07 ± 0.06	0.17978		5921.07	5509.14	SHM2 (Serine hydroxymethyltransferase 2)
	Ser to O-acetyl-L-Ser
	At1g55920	1.12 ± 0.24	0.456875		16314.6	13571.1	ATSERAT2-1 (Serine acetyltransferase 2-1)
	At2g17640	0.98 ± 0.15	0.809977		1110.94	1158.33	ATSERAT3-1 (Serine acetyltransferase 3-1)
	At3g13110	1.10 ± 0.04	0.0474454		20569.5	18529.1	ATSERAT2-2 (Serine acetyltransferase 2-2)
	At4g35640	0.90 ± 0.34	0.658956		11.1919	12.6018	ATSERAT3-2 (Serine acetyltransferase 3-2)
	At5g56760	0.88 ± 0.05	0.068997		22130.8	25210.3	ATSERAT1-1 (Serine acetyltransferase 1-1)
	O-acetyl-L-Ser to Cys
	At1g55880	0.93 ± 0.11	0.404478		2773.99	3093.82	similar to cysteine synthase
	At2g43750	0.90 ± 0.11	0.29615		5989.42	6813.55	OASB (Cysteine synthase 1)
	At3g03630	0.91 ± 0.13	0.366822		497.799	563.054	CS26 (O-acetylserine lyase)
	At3g04940	0.99 ± 0.13	0.911578		5833.57	5966.48	ATCYSD1 (Cysteine synthase D1)
	At3g22460	1.20 ± 0.27	0.290972		3456.78	2900.48	similar to OASA1 (O-Acetylserine lyase)
	At3g61440	1.02 ± 0.03	0.301147		44581.5	43380.5	ATCYSC1 (Cysteine synthase C1)
	At4g14880	1.04 ± 0.10	0.595094		52006.2	50718.4	OASA1 (Cysteine synthase)
	At5g28020	0.74 ± 0.14	0.111909		1910.68	2493.7	ATCYSD2 (Cysteine synthase D2)
	At5g28030	1.00 ± 0.11	0.987355		715.904	731.072	similar to ATCYSD2 (Cysteine synthase D2)
	Cys to glutarhione
	At4g23100	0.98 ± 0.08	0.774408		32690	33727.7	GSH1 (Glutathione synthetase 1)
	At5g27380	0.92 ± 0.13	0.427666		14998.2	15708.7	GSH2 (Glutathione synthetase 2)
	Biologically independent 3 replication of competitive microarray analyses were carried out as follows; stop1-mutant versus wild type (WT) in low pH (pH 4.5, 24 h). Means of fold change (FC) and whose ± SD are shown. Different letters (a; down-regulation, b; up-regulation) indicates significant difference from FC 1.0 (t-test, P < 0.05). Means of intensity were also shown in stop1-mutant and WT. It…
