# Supplementary material for: STOP1 Regulates Multiple Genes That Protect Arabidopsis from Proton and Aluminum Toxicities
Source: Oxford University Press journal article supplement (doi:10.1104/pp.108.134700), 2009-03-25
Supplement: plphys_v150_1_281_s1.zip [file plphys_v150_1_281_s1.zip › 134700Supplemental_Table_S4.xls]

## Sheet: S4
Supplemental Table S4. List of genes rejected during quality control of microarray data analysis, while is likely greatly down-regulated in the stop1-mutant under Al and low pH conditions.
AGI code	Fold change in WT (Al/Control)						Fold change in WT (pH4.5/Control)						Repression in the stop1-mutant in Al (stop1-mutant/WT)						Repression in the stop1-mutant in low pH (stop1-mutant/WT)
	FC ± SD	P-value	Flags	Raw	Control		FC ± SD	P-value	Flags	Raw	Control		FC ± SD	P-value	Flags	Raw	Control		FC ± SD	P-value	Flags	Raw	Control	Description
Al
At1g51340	1.16 ± 0.08	0.0723555	P	19293.9	16769.3		1.24 ± 0.10	0.0384017	P,A	30587.1	24366.1		0.23 ± 0.07	0.0126492	P	1762.51	7602.45		0.88 ± 0.04	0.0422392	P	1106.18	1250.65	MATE efflux family protein
At3g21790	15.73 ± 4.25	0.00308236	P	441.047	27.4658		1.23 ± 1.62	0.750191	P	40.2082	29.2251		0.27 ± 0.09	0.0196528	P	158.013	569.928		1.03	no replicates	A	10.328	10	glucosyl transferase family protein
At3g22250	1.67 ± 1.39	0.346644	P	221.789	131.96		0.88 ± 0.10	0.206001	P	198.101	220.384		0.20 ± 0.12	0.0367586	P,A	15.5971	86.2281		0.58 ± 0.08	0.0188335	P,A	100.567	168.076	glucosyl transferase family protein
At5g06870	0.86 ± 0.34	0.573738	P	35.6504	36.429		1.41 ± 0.75	0.356699	P	65.9375	53.8417		0.21 ± 0.12	0.0350973	P	16.1986	68.5802		0.33 ± 0.18	0.0654886	P,A	11.2497	39.3537	PGIP2 (Polygalacturonase inhibiting protein 2)
At5g07570	2.83 ± 1.47	0.0670017	P	294.503	114.396		1.05 ± 0.21	0.728992	P	118.137	111.35		0.12 ± 0.04	0.00648504	P,A	35.1572	271.408		0.72 ± 0.32	0.311596	P,A	23.1195	28.2045	glycine/proline-rich protein
At5g48100	3.20 ± 0.44	0.00465724	P	415.472	130.751		0.69 ± 0.11	0.0557083	P	88.2446	126.799		0.26 ± 0.02	0.000830234	P	276.995	1043.72		0.56 ± 0.11	0.0335565	P	42.2992	79.3391	TT10 (transparent testa 10)
At5g60770	1.77 ± 0.83	0.155268	P	173.431	98.5508		0.69 ± 0.49	0.424673	P	115.67	112.504		0.12 ± 0.06	0.0141218	P	38.7786	316.803		0.89	no replicates	A	22.4096	25.2781	ATNRT2.4 (high affinity nitrate transporter 2.4)
At5g64210	1.32 ± 0.81	0.488445	P	35.529	23.9811		1.01 ± 0.61	0.98028	P	126.437	136.538		0.14 ± 0.07	0.0194074	P,A	4.94794	34.343		n.a.	low intensity	A	< 10	< 10	AOX2 (alternative oxidase 2)
pH
At1g69230	0.66 ± 0.10	0.0403603	P	45.8177	71.813		1.00 ± 0.40	0.984765	P	55.7417	56.3996		0.60 ± 0.09	0.0288519	P	37.0376	58.3632		0.42 ± 0.06	0.00851655	P	18.4285	41.4472	SPIRAL1-LIKE2 belongs to a six-member gene family
Repressed genes in the stop1-mutants were identified by comparative microarray analyses as shown in Fig 1 and Table1. The genes listed here are rejected during quality control of the spot raw data due to Flags A or M, which indicated problems in the quality of spot data. If the gene carried multiple insufiicient flags (i.e. A and/or M), the data was omitted from the datamining even if they had re…
