# Supplementary material for: STOP1 Regulates Multiple Genes That Protect Arabidopsis from Proton and Aluminum Toxicities
Source: Oxford University Press journal article supplement (doi:10.1104/pp.108.134700), 2009-03-25
Supplement: plphys_v150_1_281_s1.zip [file plphys_v150_1_281_s1.zip › 134700Supplemental_Table_S5.xls]

## Sheet: S5
	Supplemental Table S5. Primer sequences used for quantitative RT-PCR of the markedly down-regulated genes of the stop1-mutant.
	Name		Sequence (5'-)	Tm (℃)	Annealing temp. (℃)
	At1g08430	F	GGCCGACCGTGCTATACGAG	62.5	53
		R	GAGTTGAATTACTTACTGAAG	50.7
	At1g08430-2	F	GGCCGACCGTGCTATACGAG	62.5	53
		R	CATGAGTCCTGTGAACTCCC	58.4
	At1g30270	F	CAGTCGACATAAGCTGTTTACTTTT	55.56	53
		R	GAATCTCAGCGTCCGACAATATAGAA	58.91
	At1g34370	F	CATCAGCCAGTACATCTACTCAGA	58.8	53
		R	ATGGCAATGCCTTAGAGACTAGTA	57.1
	At1g51830	F	ATGTGTATGACCGAAAATGGTACCCGATC	61.9379	53
		R	CCTCCATTACATTGCTCGGGGCTTAAGT	63.4429
	At1g51840	F	TTAATAAACACTGGGAAGACT	50.7	53
		R	ACCGCTTTGAGTAGCGTATACA	56.7
	At1g67325	F	AAGACAAGATCCACGAGGACGAC	60.5	53
		R	GTCGTAGACATGTTTGGGGGTTG	60.5
	At1g77760	F	GGTTTATAACTGAAGCTGTGCTTAG	57.2	53
		R	CTATAACAAAAGTGCCCAAATAACC	55.56
	At2g18480	F	AAGGCGATCACGACAGGGGGCGTG	67.3	53
		R	TTATGAGAAACCCCCAATAGAGATG	57.2
	At2g19900	F	GTGTTCGTCCTTCAGCGTGTTTACCTGT	63.4	53
		R	GCAAGTGGGCTATTCGTTAACTTCTGTG	62
	At2g19900a	F	CACATACCGTCTCTACCGTTGA	58.6	60
		R	GAGAGATCTTGGCATGTGTTTGA	56.9
	At2g28270	F	AGAGAGATGGCGATAATACATCAAC	57.2	53
		R	ATGGTCCTCCCAAGATTCATCATTT	57.2
	At2g37330	F	TAGTGATCTCTCTGTCTCCGGTTTT	58.84	53
		R	GTTTCAATCTGAGGAGAAGACATGA	57.2
	At2g37330a	F	TATCGATCCTTGCCGGGACTTCA	60.5	60
		R	GCTTGTCTTGGCGTTGCTCCTA	60.4
	At2g37570	F	AGAGATCCCATTATCAAACCGAATC	57.2	53
		R	CCCATTAAAACAGTGAAAACGCCTA	57.2
	At2g41380	F	GCGTATCAGACGGCTAAGGAGA	60.43	53
		R	CCAGGAATGCTGGAACGACAAAGTT	60.47
	At3g05400	F	TAGCTGGGAGTTTAGTGACCATAGC	60.47	53
		R	AATTTATGGATACGATCGAAGCCGA	57.2
	At3g22200a	F	TGTTAGTCCGTGTTGCAGGTGA	58.6	60
		R	CACTTCTTGTGCTGAGCCTTGA	58.6
	At3g28345	F	GCTTTGGACAGCCAGTCGGAACGTG	65.4	53
		R	TGATTACAAATAATTTCATTAGCGA	50.64
	At4g13420	F	GCGAGAGAGAAAGGGATGGTTTATC	60.48	53
		R	TCCCCTAAACATGGAGACACTTTAT	57.2
	At5g02480	F	ACTTTCAAGCTGGTTGATCAGATGG	58.84	53
		R	TGGTTAAATACAACTTGCTCTGAAG	55.56
	At5g06860	F	TAAACCAAGCTTATCTCTAGGATTA	53.92	53
		R	CCATCAAATAAAACATTTTGAAAATGTGC	54.869
	At5g07440a	F	AGGAGTGACAGTGAGTTACTTCG	58.7	60
		R	TGGCTCGAGCGACTCGGTTA	60.4
	At5g11670	F	GCACAAGTGACAGAAGAGCATTAC	58.8	53
		R	GAGAGTTCACAAACAGCATCATAATG	57.3
	At5g11670a	F	AGCATTACGCCAATGGTCTGATCTA	58.8	60
		R	TTCGACGCCAATCCGAGGTCATA	60.5
	At5g17330	F	ACAGGAAGAAGACGAGTGGTAT	56.7	53
		R	GAAACTTGGTTCAGTAATAAAGGGA	55.6
	At5g18170	F	GAAGGTGAACGATGAGCTAAAGACT	58.8	53
		R	GCGTCTTCTAGTACTTGTAAACACA	57.2
	At5g18170a	F	GTGGCTCAAGCTACCATTCTCAGA	60.5	60
		R	CTGTTAACTCAGGATGACCTCTA	56.9
	At5g19600	F	CCTTCTTCTTAGTTATTAGTGGGAA	55.56	53
		R	GAAATTTTCATTTATCGCTTCTTGC	53.92
	At5g22890	F	CGTTTCTTTGTTTTTGGGCCACGTA	58.84	53
		R	TCTATGCATGATACCCATCAGAACC	58.84
	At5g27920	F	GGGTTCAAGACGTTGACTTAGTTC	58.7583	53
		R	TATGGATCCAAAACAAACCGCTACTA	57.3385
	At5g47560	F	GCATATAGAGATCAAAGACATGATC	55.56	53
		R	GACCTCATCTAAATTTCCCATTCCA	57.2
	At5g51980	F	TGTATACAAACACTCACTGATCATT	53.92	53
		R	TCTTTGACGATAGCATCAAACTTTC	55.56
	At5g35410	F	GAGGGATTATCTTCGATCAAGGCCG	62.12	53
		R	CAAGAAGCAAATCTTCCAATCTCCC	58.84
	At5g38200	F	GTTTCATGTGAATGAATCGCATGCA	57.2	53
		R	TCATTGTTGGATCTACATCAGCAAT	55.6
	At5g66650	F	CGGATTAGGCCTAATAATGGCC	58.6	53
		R	AAGAATTACGATCAACAACGACCAG	57.2
	At3g52590 (internal std.)	F	TCGTAAGTACAATCAGGATAAGATG	55.6	53
		R	CACTGAAACAAGAAAAACAAACCCT	55.6
	At3g52590a (internal std.)	F	AGAGCTGTCAACTGCAGGAAGAA	58.7	60
		R	ACAAGAAAAACAAACCCTATCAAAGG	55.8
	Tm indicates melting temparature calculated with GC% method.
	At1g08430-2 primer is used for RT-PCR in Fig. 3.
	At2g37330a primer is used for Real-time RT-PCR in Fig. 2.
	At2g19900a, At3g22200a, At5g07440a, At5g11670a, At5g17330, At5g18170a and At3g52590a primer is used for real time RT-PCR in Fig. 5.
